# Supplementary material for: Hsa-miR-520d induces hepatoma cells to form normal liver tissues via a stemness-mediated process
Source: PubMed Central journal article supplement — Sci Rep. 2014 Jan 24;4:3852. doi: 10.1038/srep03852 (PMC3900933; doi:10.1038/srep03852), 2014-01-24
Supplement: srep03852-s1.pdf [file srep03852-s1.pdf]

# Hsa-miR-520d induces hepatoma cells to form normal liver tissues via a stemness-mediated process

Satoshi Tsuno<sup>1</sup>, Xinhui Wang<sup>1</sup>, Kohei Shomori<sup>2</sup>, Junichi Hasegawa<sup>1</sup>, Norimasa Miura<sup>1</sup>

Authors' Affiliations:

<sup>1</sup>Division of Pharmacotherapeutics, Department of Pathophysiological & Therapeutic Science, <sup>2</sup>Division of Organ Pathology, Tottori University, 86 Nishicho, Yonago, Tottori 683-8503, Japan

Correspondence and requests for materials should be addressed to N.M.  
([mnmiura@med.tottori-u.ac.jp](mailto:mnmiura@med.tottori-u.ac.jp)).

Keywords: cancer, stemness, miRNA, differentiation, iPSC

Running title: A single miRNA may revert hepatoma to pluripotent stem cells.

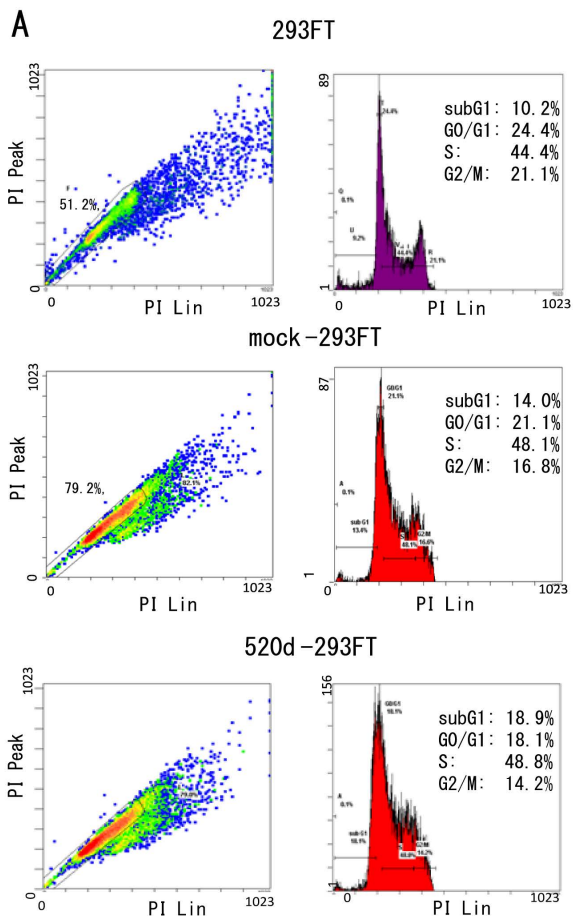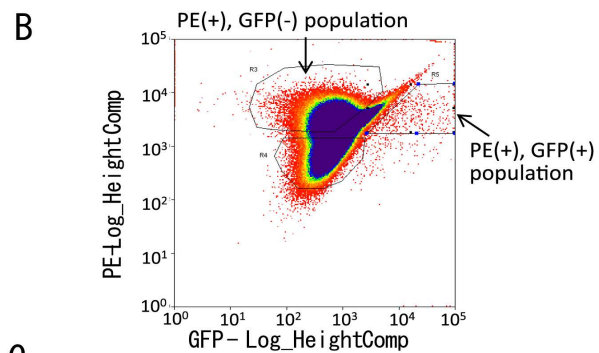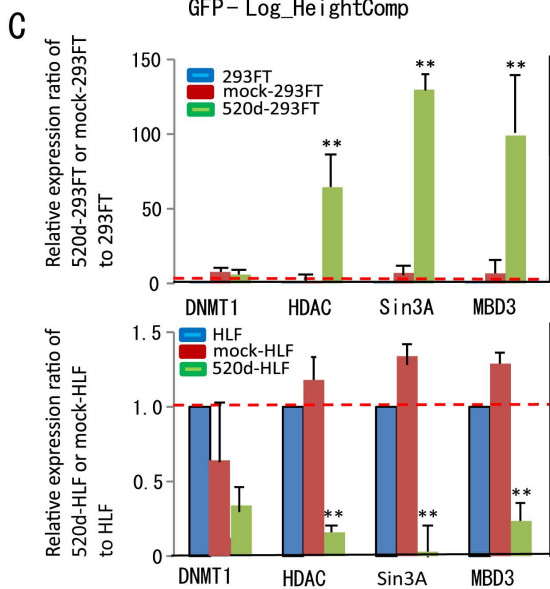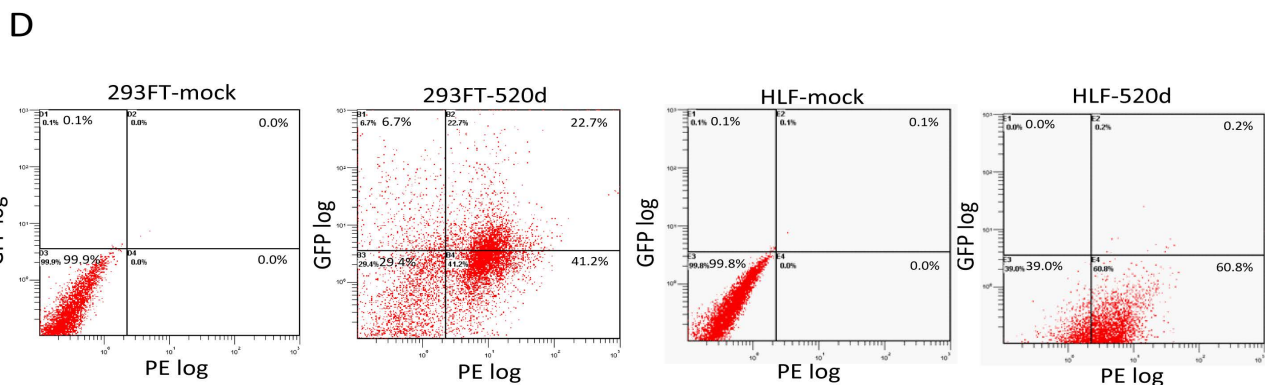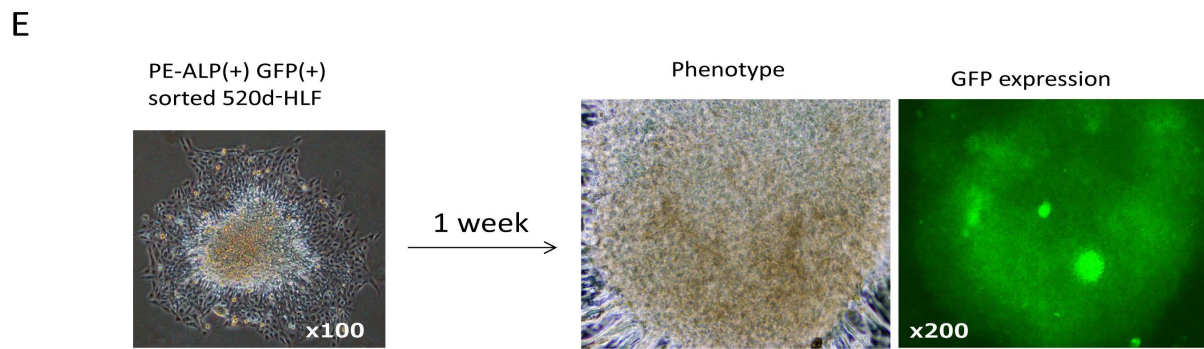

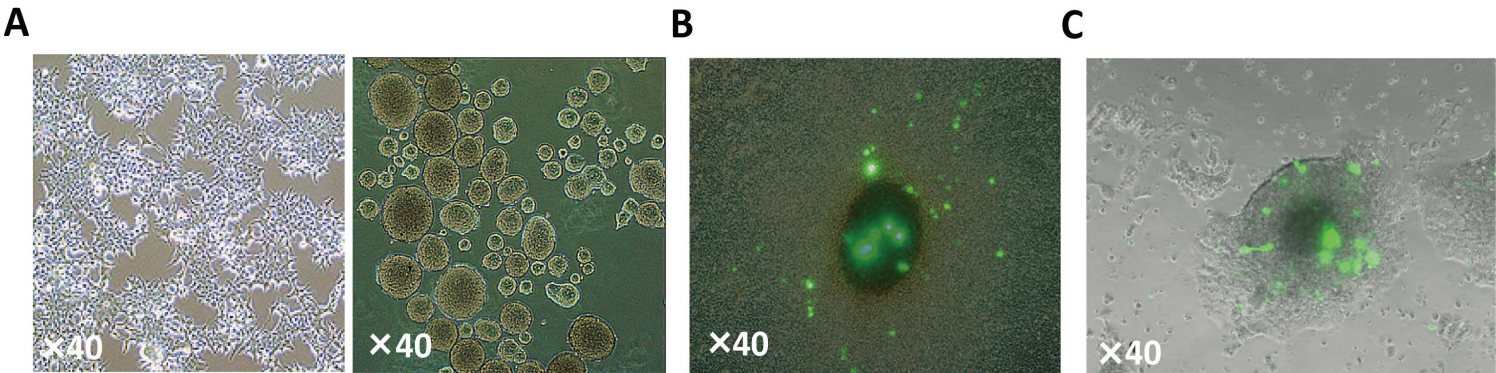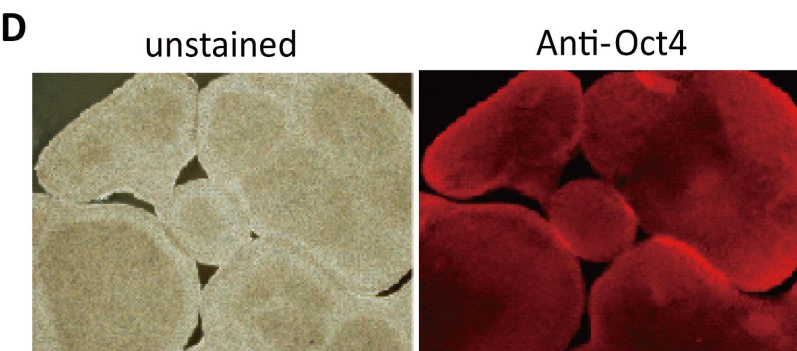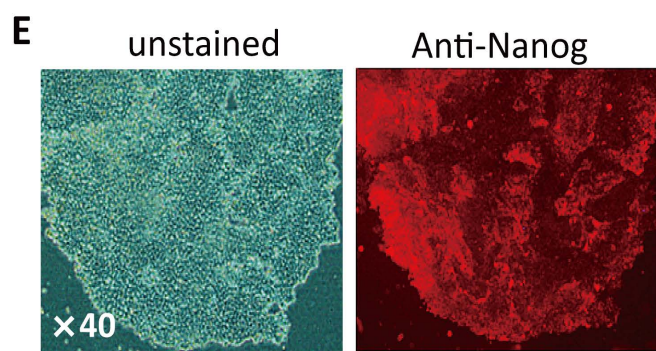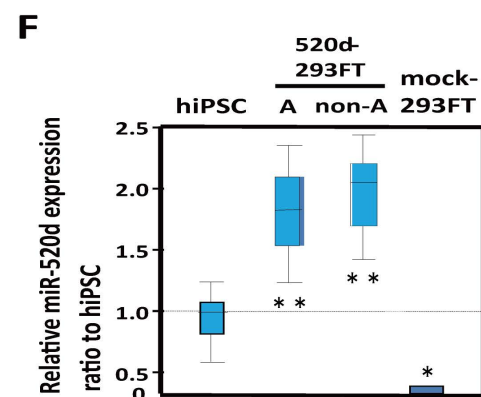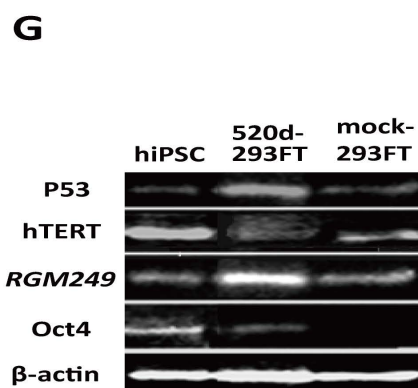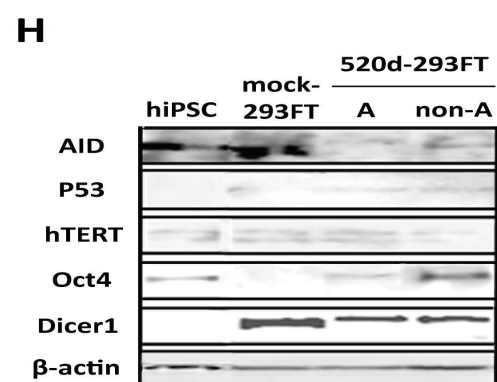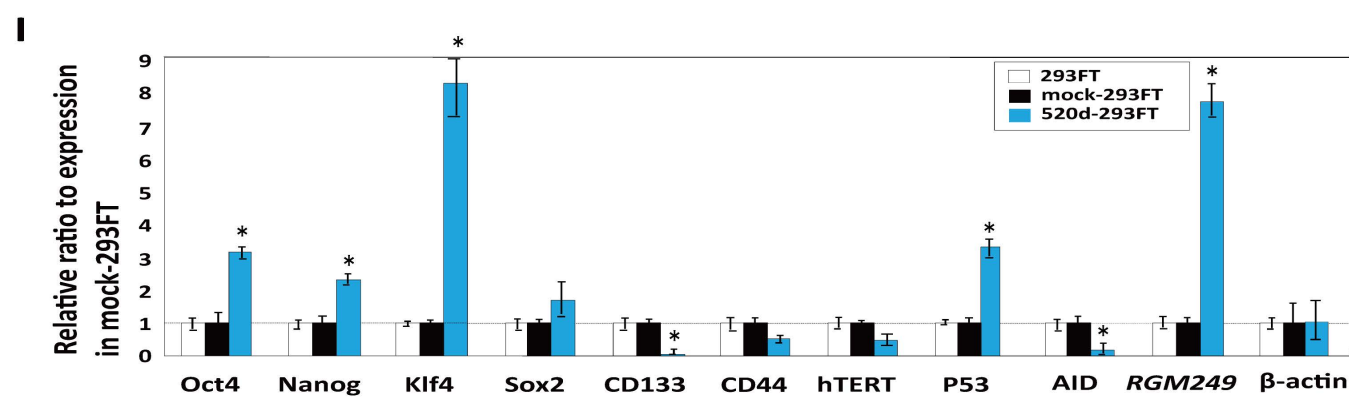



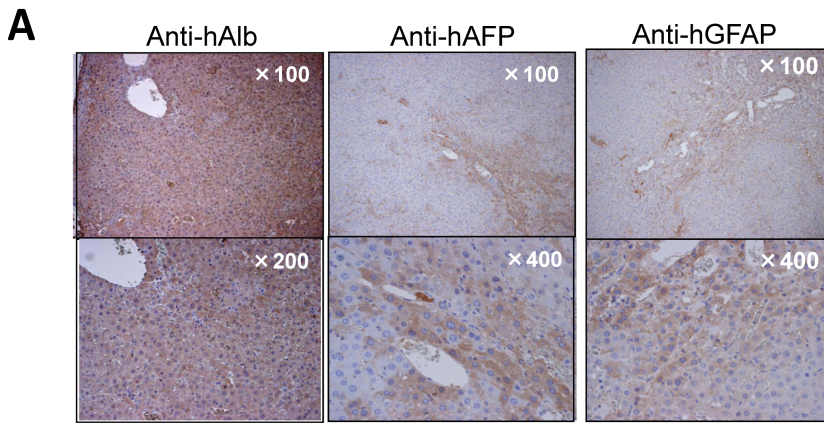

**B** 520d-HLF treated with  $2\mu\text{M}$  Purmorphamine

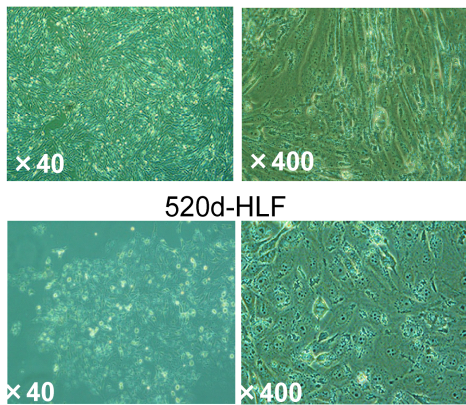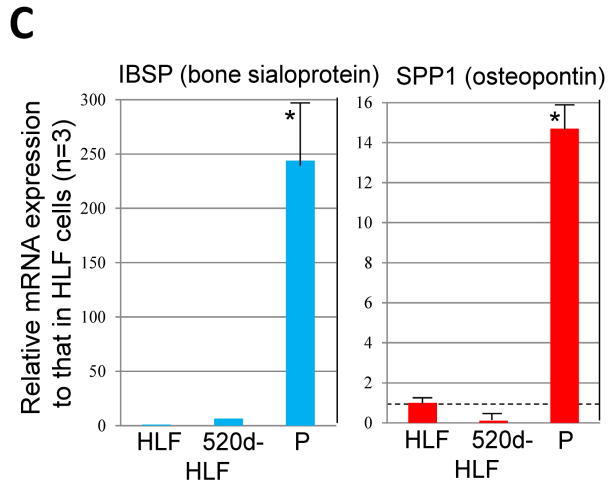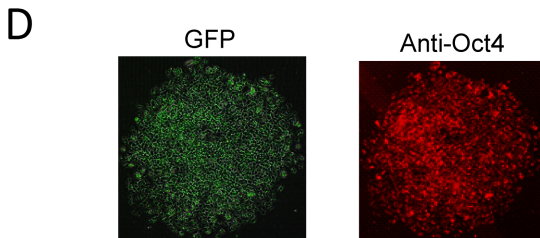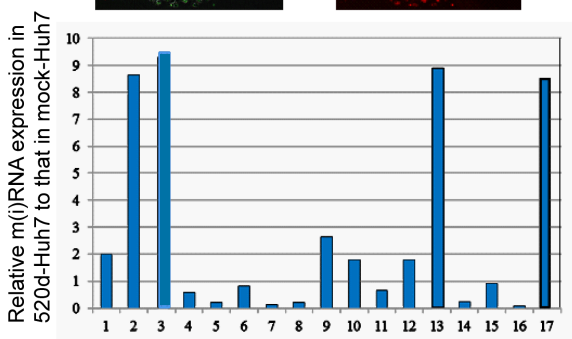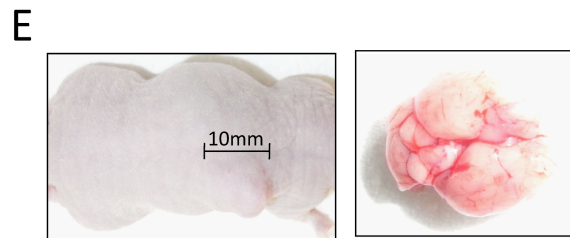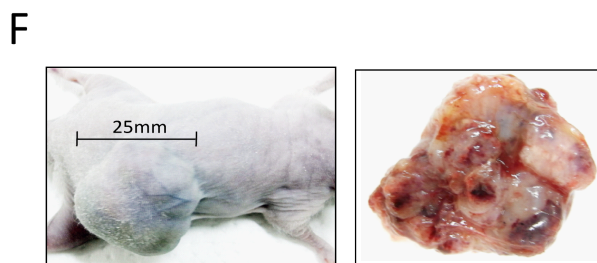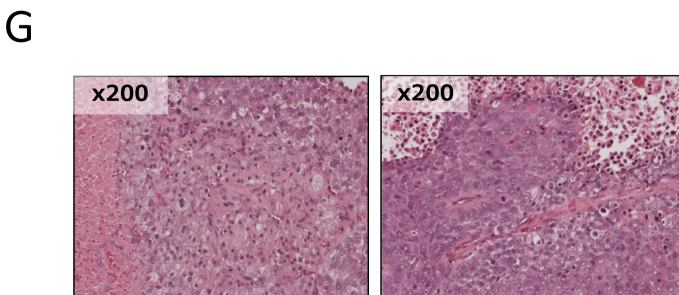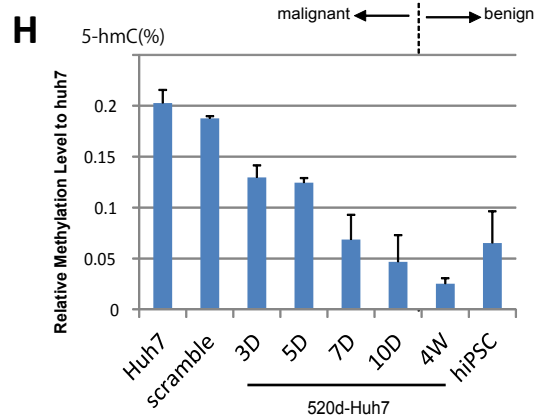



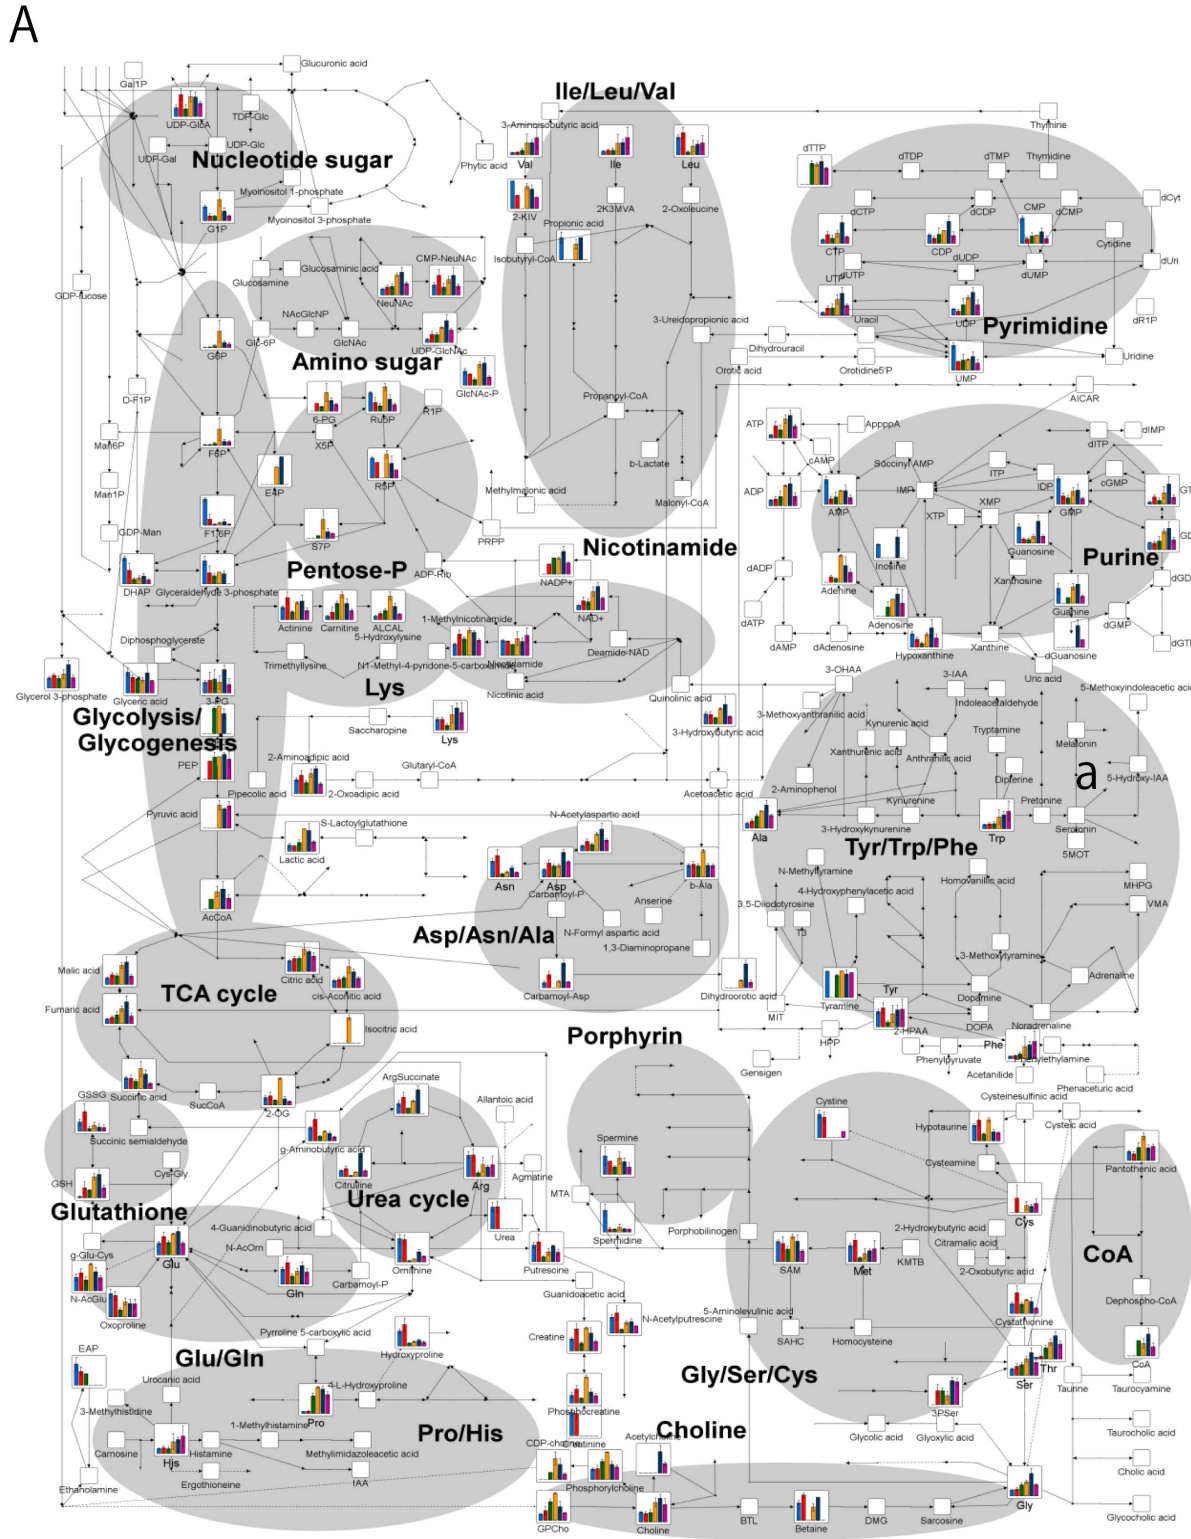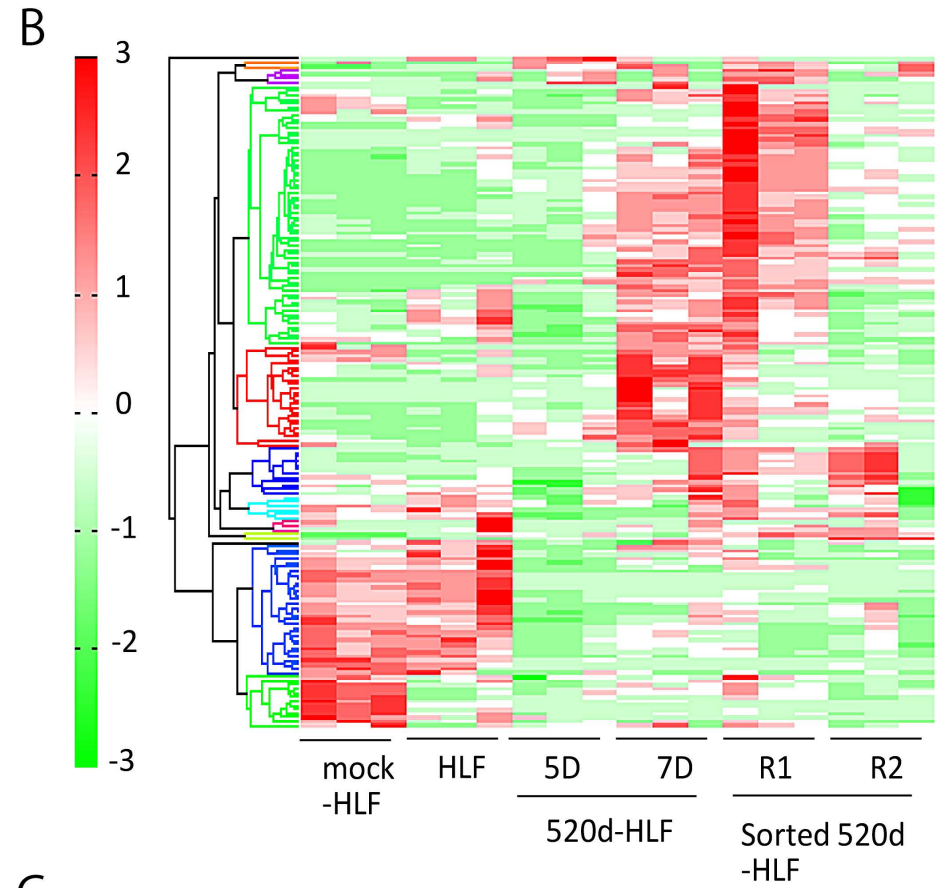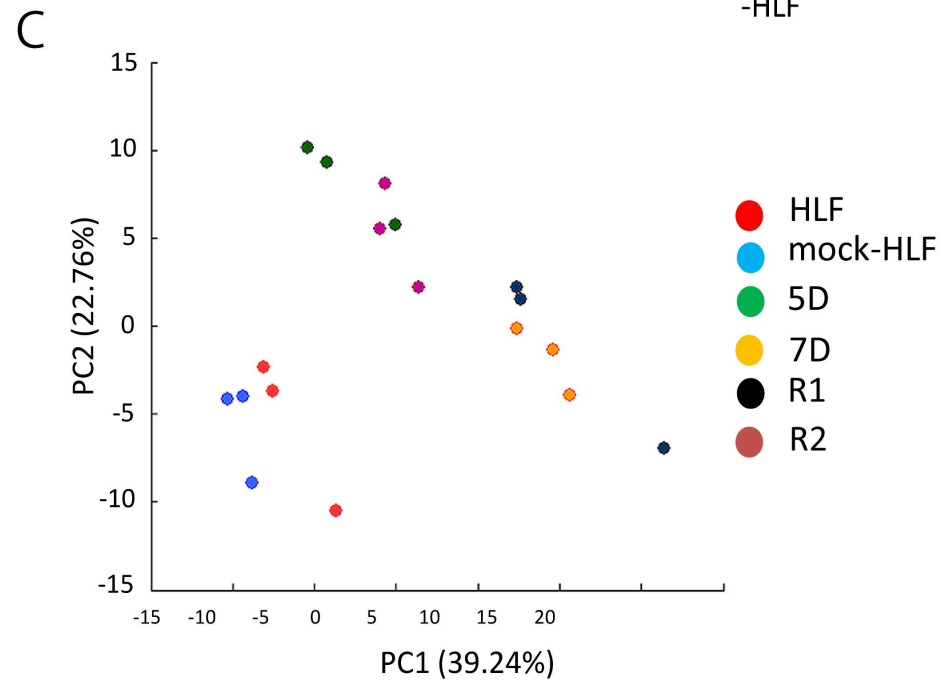

1 UGAGCUCUUGUCCUCAGUCCAUUUUAUAUAUGAAAACUAUAACAACAACAAAGGCAAGUUAAGAGAAAACUUUAUACAUIA 75  
 (1356) AGGGAAACAU  
 252 Primer sense (amplicon 100bp)  
 76 GUAAAUGUCUUUGUA AUCAGUGUUG--CTGCCATGGAAACACA ACTG--UGUGUUUGGUUUACAUIUUAAGCAUUGCU 450  
 UUCCCG--AAGGGAAACAU  
 451 GUUAUGUCUGUUUAAGAAAAGUAUUUUGAAGUUUACAUIUUUAUUUAUGAAGUUUAAAACAGUAUUUAUUUUGUA 525  
 526 AUUAUGAUUUUGGGUUGGGGAAGGGGGG---AGCGAATTGAGGCAGAAGAA---UUUAGAAAGAUUU AUGGUGUAGAAAA 825  
 GGAAACAU CCGAAG--GGAAACAU  
 826 UACUUUUGAGAUUUUGUAUGAAAGGAGUAGAAUCAUUGGGGGGAAACACUGCU GGUUUCAUUUUUGUA AUCACC 900  
 901 AGUGGAGCGUCUGAUCAUCCUGGUUAUU AUGU-----ACUUGCAGUAUUGUUUGAAGAAUUGUUUUG 1125  
 AAACAU  
 1126 UCUUAAGGAAAAAAGACGUUGCACAUGA UUUGUACUGCAGCAAUCAGCAAAGUGAUCUGAGUUGGAUUAUUUU 1200  
 1201 GAAGGUUUUUUGAAAGUUACGUUCAAGGCUAACACCUGAGCUUUGUGUAAUGUAAAUAAGACCUUGUGUUUAUGA 1275  
 AGGGAAACAU UCCC  
 1276 ACCUUUCAGCUAAUUUAAUUUUUUUCCCUACAUGCCAAGUGAUGUUCAGGUUUUGAA UGUUUUUGUAUCAGUU 1350  
 GAAGGGAAACAU  
 1351 UUUUCCUUUGUA AAUGGCAUUAACA UUGUACUUGAGGUCUUGCUUAAUCACUUUUGUUGUCCUGAGGACUUGAA 1425  
 1426 UUUACAGUGCAUCAGAUUUGUUGCAAUUUUUG-----CAUAGGUUUUGAACAAAUUUCCCUACAUIUUU 1575  
 GAAGGGAAACAU  
 1576 UCAUACAAAAUCAUAAAUAUCUGUAUGCUAUUGAAA UUAACUUUGUAUGAUGCUUAAAAACCACUAUUUGGGG 1650  
 1651 AAAUAAUAAAUAAGUCUUUACCAUGUAUGAAAGAAAUUUUAAAAAAUACAAAUAUUUUCUGAUUAGCAUCUAG 1725  
 UUCC  
 1726 CUUAUAAUAAAUUUCAA AAAAGCUGAAGGCAAAAUGCCUUCAUCAGGAUGCACUGAGAACUAUAUAGUU ACGU 1800  
 CGAAGGGAAACAU  
 1801 CCUGCUUUUUGUA UAAACUGAGAUGCUCACAUGCUUCCCCUAGAACAGGCAAUGUGCUAUGCAUAACA UAGUUG 1875  
 1876 UACAUUAUCUUUGCGGUUGCUUUGAGUUUUUAU-----GUAUUUAUUUGAAGUUGUACAGUAUGACUUA 2325  
 CC  
 2326 AUUCACAUCUGUUGGAAUAGAAAUAUAUUCUGUUGAGUAUUUAAGAGGCUGUACAUGUUUUCUUUUGUGUUU GG 2400  
 GAAGG GAAACAU  
 2401 AUU --- CUUUGUA CUUUUUC AUGUUCAGUACAUCAUAAACAAAGUUGAAGGG 2450 (3805)



A

NHDF-Neo

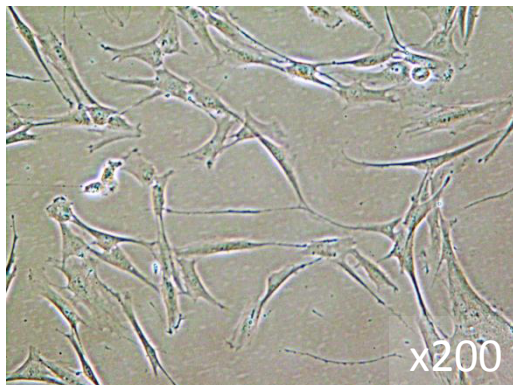

NHDF-Ad

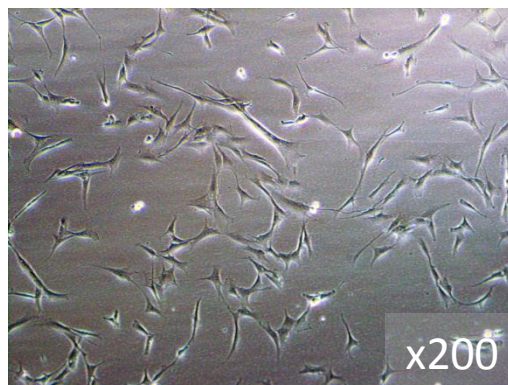

B

520d-NHDF-Neo

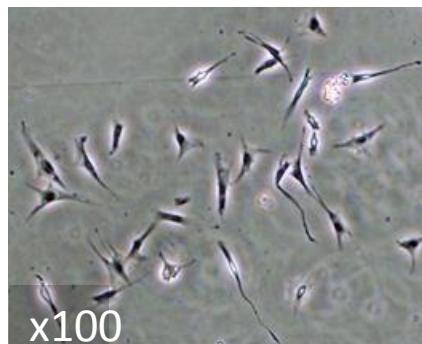

520d-NHDF-Neo Oct4

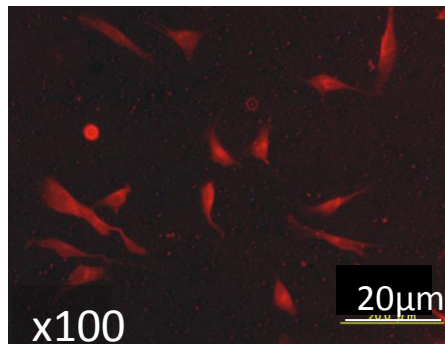

520d-NHDF-Neo Nanog

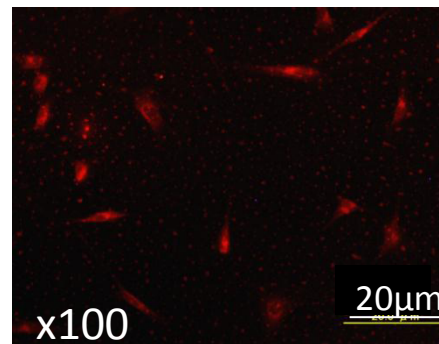

C

520d-NHDF-Ad

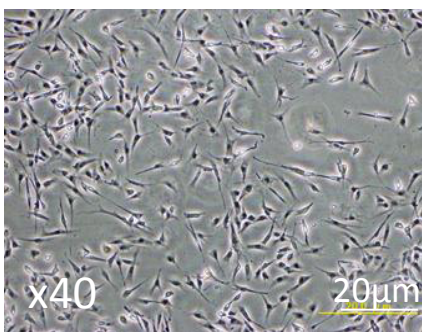

520d-NHDF-Ad Nanog

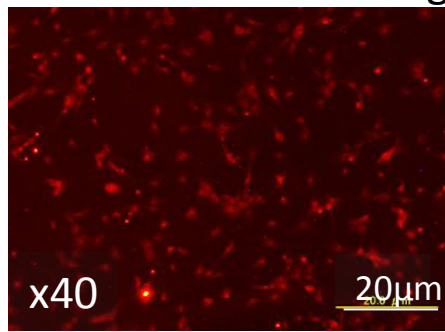

D

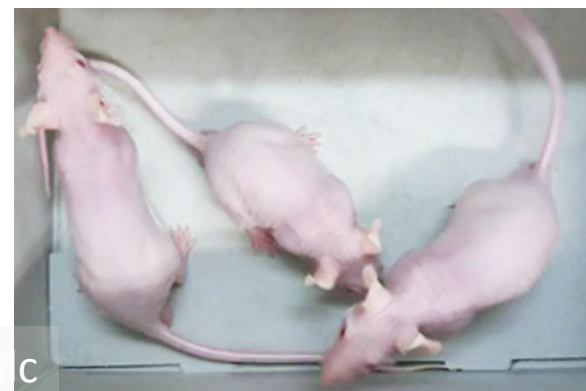

tumor formation 0/6



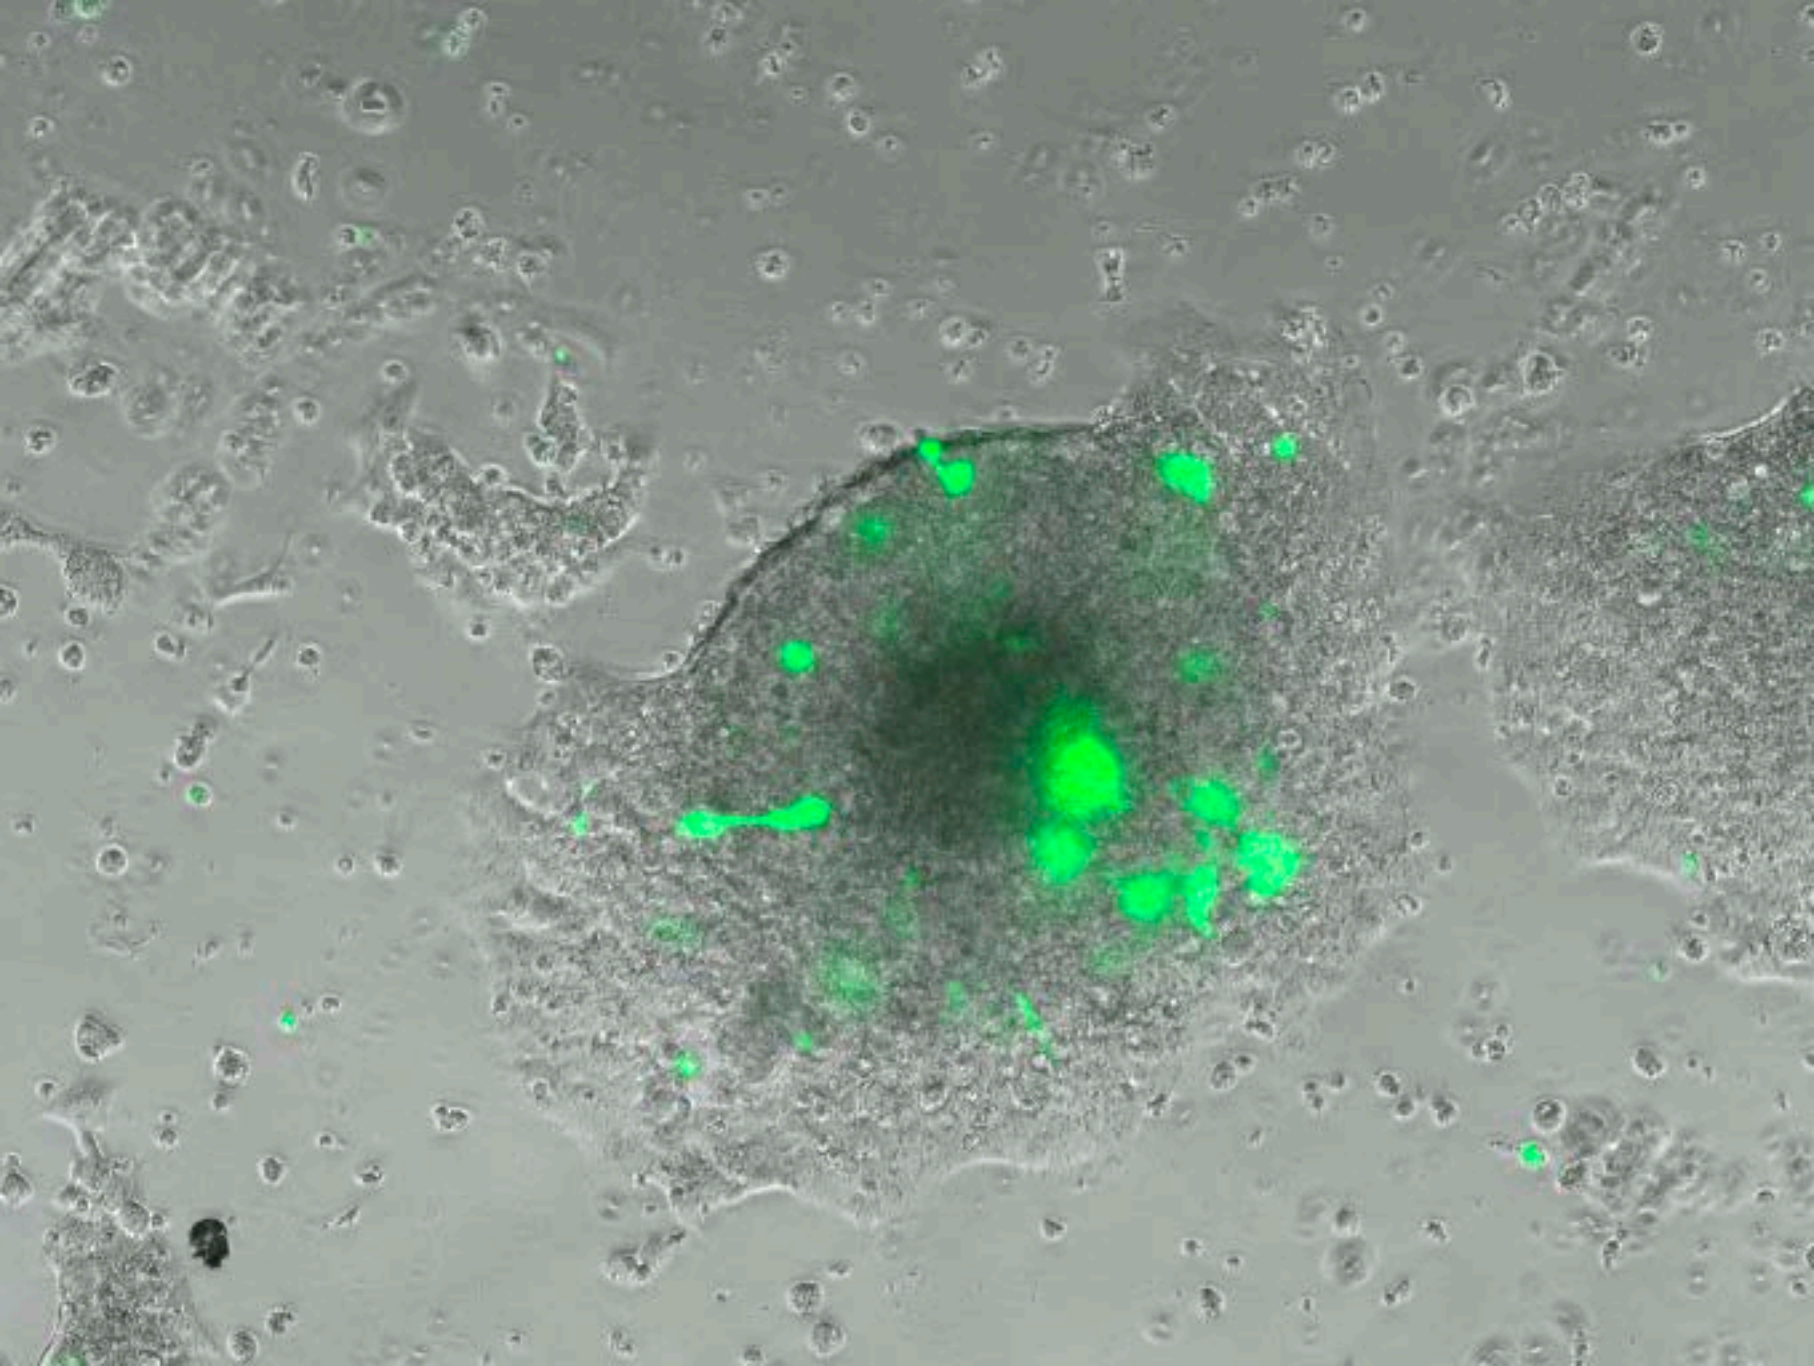

HLF

pCDH (mock)-HLF

psiLV (scramble)-HLF

unstained

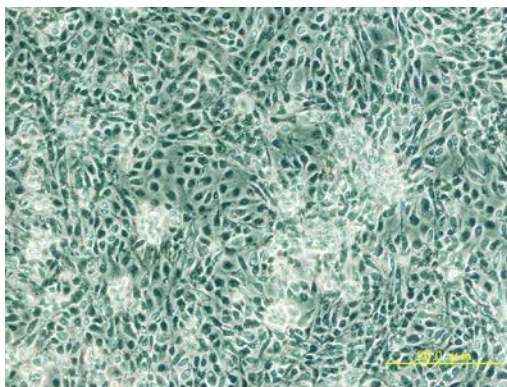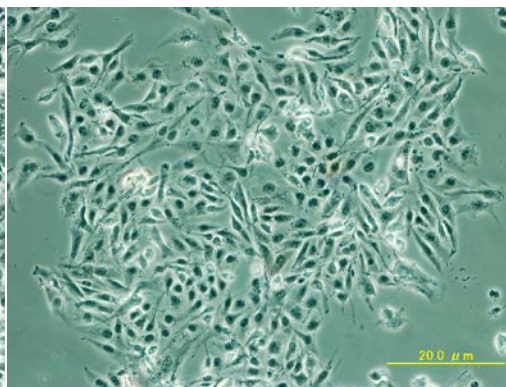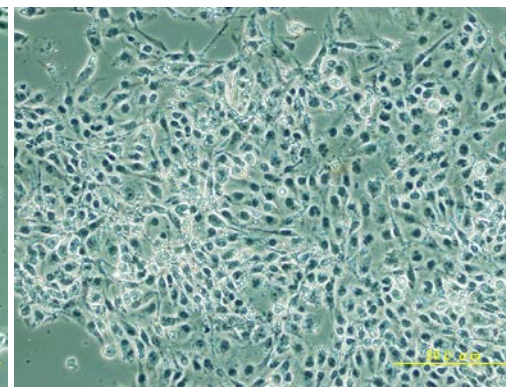

ICC: Nanog

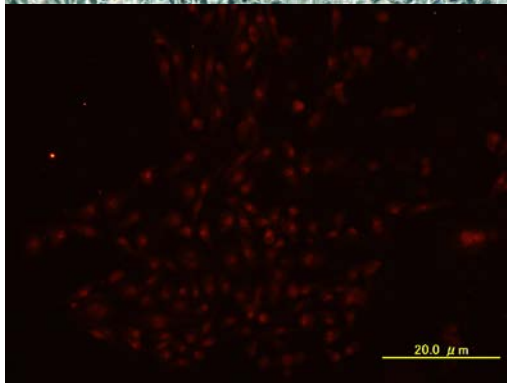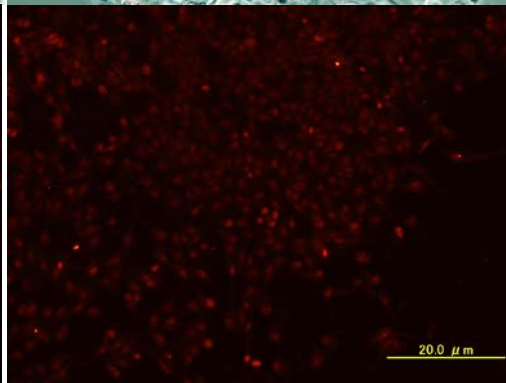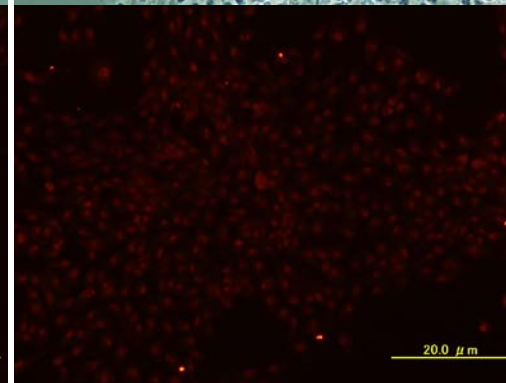

ICC: Oct4

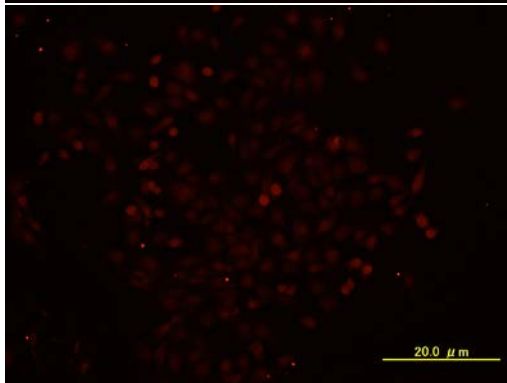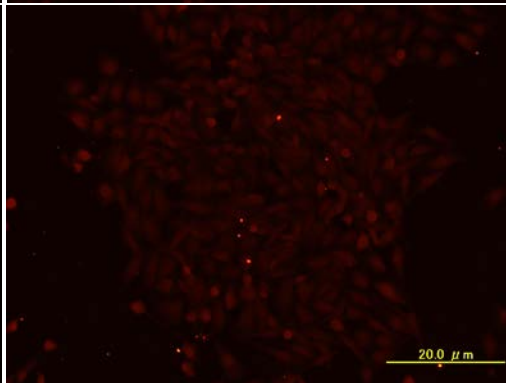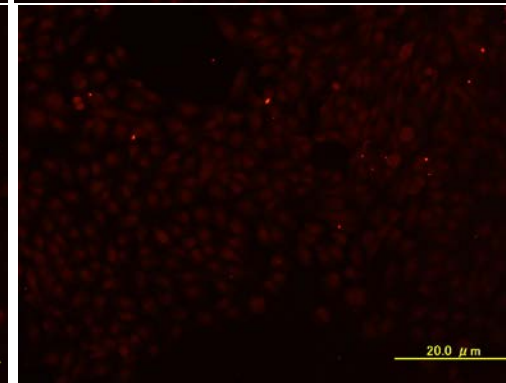

bar 20μm



Normalized\_Data

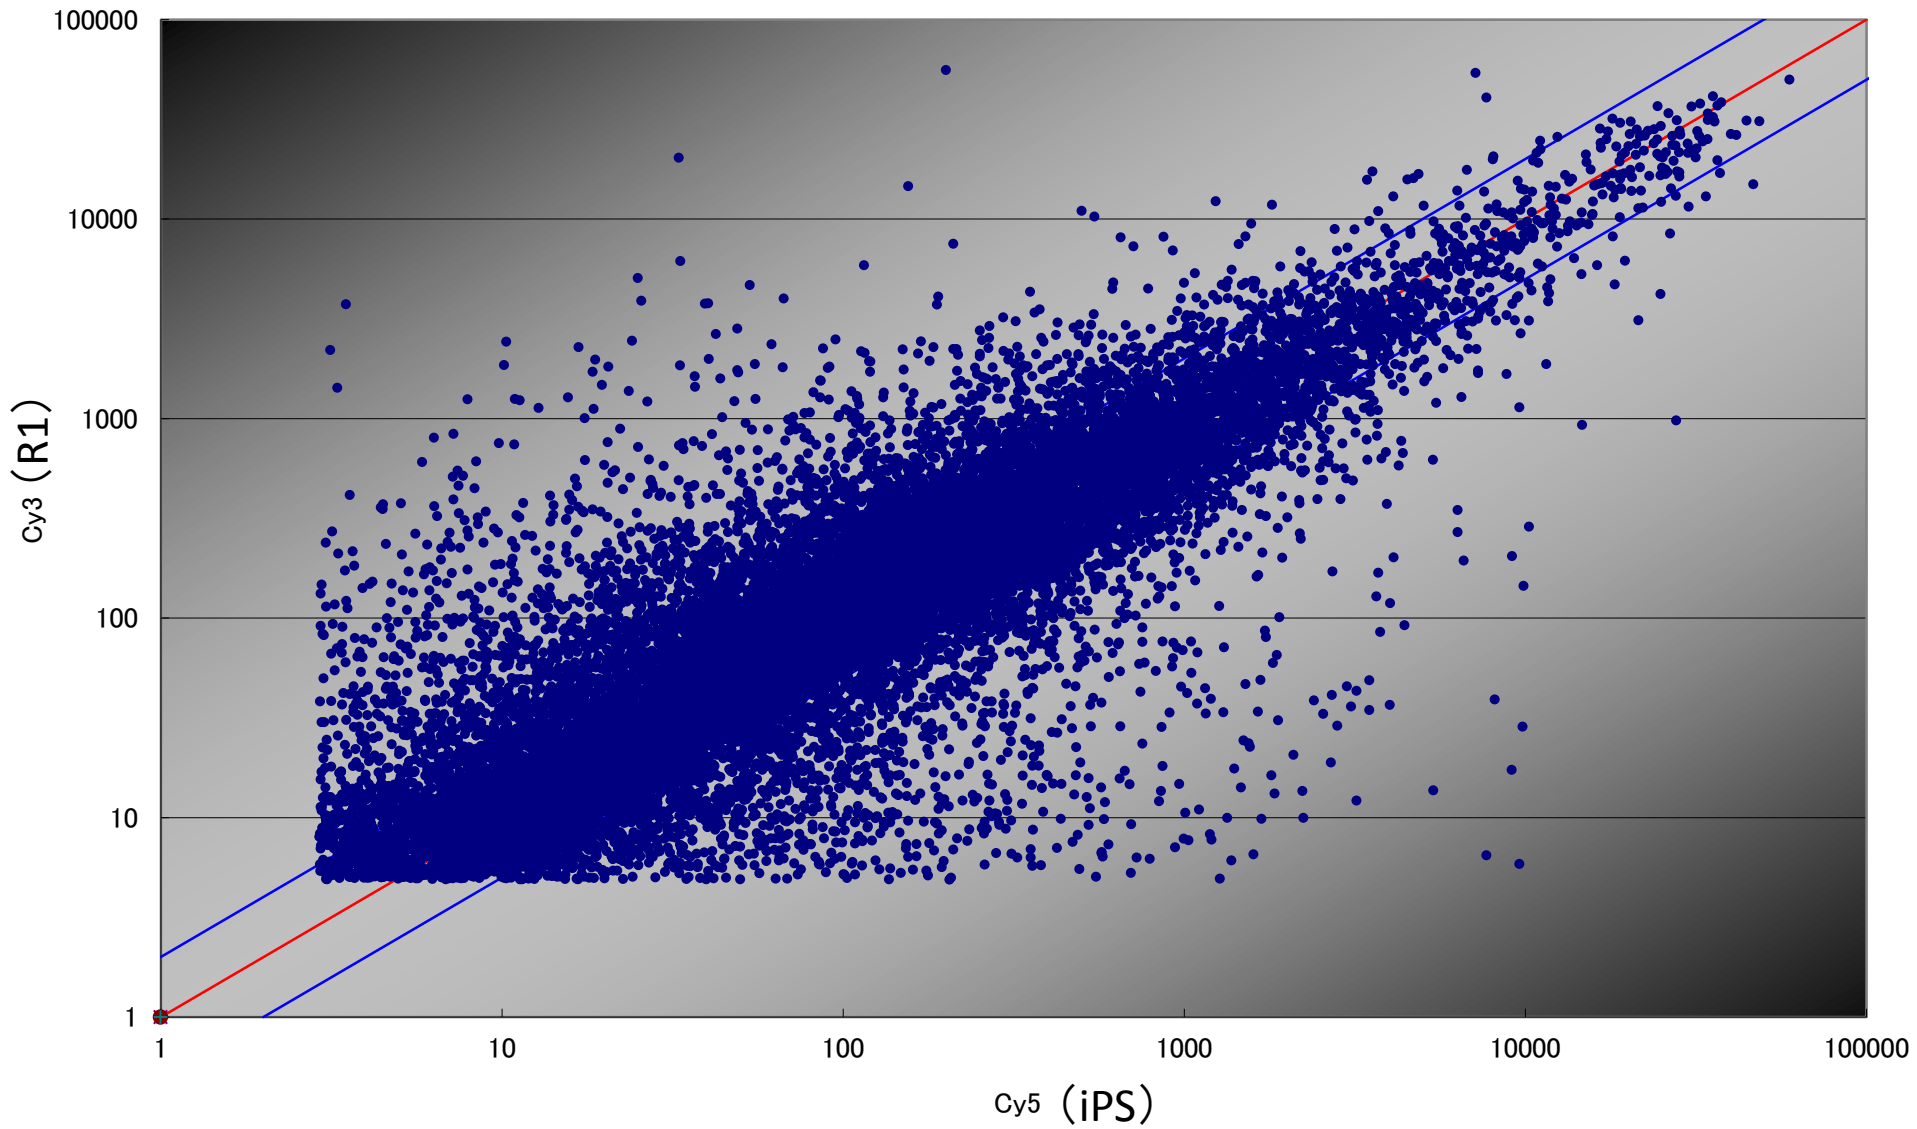



| symbol      | description                                                                                                                                                                                                                     | LOG2[ratio(R1/iPS)] |
|-------------|---------------------------------------------------------------------------------------------------------------------------------------------------------------------------------------------------------------------------------|---------------------|
| SEMA3C      | Semaphorin-3C Precursor (Semaphorin-E)(Sema E)                                                                                                                                                                                  | 10.06               |
| MAGEC2      | Melanoma-associated antigen C2 (MAGE-C2 antigen)(MAGE-E1 antigen)(Hepatocellular carcinoma-associated antigen 587)(Cancer/testis antigen 10)(CT10)                                                                              | 9.45                |
| TM4SF1      | Transmembrane 4 L6 family member 1 (Tumor-associated antigen L6)(Membrane component surface marker 1)(M3S1)                                                                                                                     | 9.26                |
| RP13-36C9.3 | Cancer/testis antigen 45-3 (CT45-3)                                                                                                                                                                                             | 8.75                |
| IGFBP7      | Insulin-like growth factor-binding protein 7 Precursor (IGF-binding protein 7)(IGFBP-7)(IBP-7)(MAC25 protein)(Prostacyclin-stimulating factor)(PGI2-stimulating factor)(IGFBP-rP1)                                              | 8.12                |
| NT5E        | 5'-nucleotidase Precursor (EC 3.1.3.5)(Ecto-5'-nucleotidase)(5'-NT)(CD73 antigen)                                                                                                                                               | 7.87                |
| MMP1        | Interstitial collagenase Precursor (EC 3.4.24.7)(Matrix metalloproteinase-1)(MMP-1)(Fibroblast collagenase) [Contains 22 kDa interstitial collagenase;27 kDa interstitial collagenase]                                          | 7.65                |
| PAGE2       | G antigen family E member 2 (Prostate-associated gene 2 protein)(PAGE-2)                                                                                                                                                        | 7.52                |
| FILIP1      | Filamin-A-interacting protein 1 (FILIP)                                                                                                                                                                                         | 7.51                |
| ALPK2       | Alpha-protein kinase 2 (EC 2.7.11.-)(Heart alpha-protein kinase)                                                                                                                                                                | 7.29                |
| CCL2        | C-C motif chemokine 2 Precursor (Small-inducible cytokine A2)(Monocyte chemoattractant protein 1)(Monocyte chemotactic protein 1)(MCP-1)(Monocyte chemotactic and activating factor)(MCAF)(Monocyte secretory protein JE)(HC11) | 7.24                |
| PRAME       | Melanoma antigen preferentially expressed in tumors (Preferentially expressed antigen of melanoma)(OPA-interacting protein 4)(OIP4)                                                                                             | 7.08                |
| IL18        | Interleukin-18 Precursor (IL-18)(Interferon-gamma-inducing factor)(IFN-gamma-inducing factor)(Interleukin-1 gamma)(IL-1 gamma)(Iboctadekin)                                                                                     | 6.98                |
| AC069282.6  | Putative uncharacterized protein FLJ21075 Precursor                                                                                                                                                                             | 6.85                |
| FGB         | Fibrinogen beta chain Precursor [Contains Fibrinopeptide B]                                                                                                                                                                     | 6.84                |
| IFI44       | Interferon-induced protein 44 (p44)(Microtubule-associated protein 44)                                                                                                                                                          | 6.84                |
| MVP         | Major vault protein (MVP)(Lung resistance-related protein)                                                                                                                                                                      | 6.76                |
| SPANXD      | Sperm protein associated with the nucleus on the X chromosome D (SPANX-D)(SPANX family member D)(Nuclear-associated protein SPAN-Xd)(Cancer/testis antigen 11.4)(CT11.4)                                                        | 6.71                |
| IFI44L      | Interferon-induced protein 44-like                                                                                                                                                                                              | 6.69                |
| CXCL2       | C-X-C motif chemokine 2 Precursor (Macrophage inflammatory protein 2-alpha)(MIP2-alpha)(Growth-regulated protein beta)(Gro-beta) [Contains GRO-beta(5-73)(GRO-beta-T)(SB-251353)(Hematopoietic synergistic factor)(HSF)]        | 6.66                |

| symbol   | description                                                                                                                                                                                                                                                                              | LOG2[ratio(Cy3/Cy5)] |
|----------|------------------------------------------------------------------------------------------------------------------------------------------------------------------------------------------------------------------------------------------------------------------------------------------|----------------------|
| LIN28    | Lin-28 homolog A (Zinc finger CCHC domain-containing protein 1)                                                                                                                                                                                                                          | -10.69               |
| TACSTD1  | Tumor-associated calcium signal transducer 1 Precursor (Major gastrointestinal tumor-associated protein GA733-2)(Epithelial cell surface antigen)(Epithelial glycoprotein)(EGP)(Adenocarcinoma-associated antigen)(KSA)(KS 1/4 antigen)(Cell surface glycoprotein Trop-1)(CD326 antigen) | -10.22               |
| EPCAM    | Tumor-associated calcium signal transducer 1 Precursor (Major gastrointestinal tumor-associated protein GA733-2)(Epithelial cell surface antigen)(Epithelial glycoprotein)(EGP)(Adenocarcinoma-associated antigen)(KSA)(KS 1/4 antigen)(Cell surface glycoprote                          | -9.05                |
| GAL      | Galanin Precursor [Contains Galanin;Galanin message-associated peptide(GMAP)]                                                                                                                                                                                                            | -8.62                |
| L1TD1    | LINE-1 type transposase domain-containing protein 1 (ES cell-associated protein 11)                                                                                                                                                                                                      | -8.44                |
| SERPINB9 | Serpin B9 (Cytoplasmic antiproteinase 3)(CAP-3)(CAP3)(Proteinase inhibitor 9)                                                                                                                                                                                                            | -8.05                |
| FGF13    | Fibroblast growth factor 13 (FGF-13)(Fibroblast growth factor homologous factor 2)(FHF-2)                                                                                                                                                                                                | -8.02                |
| SLC16A9  | Monocarboxylate transporter 9 (MCT 9)(Solute carrier family 16 member 9)                                                                                                                                                                                                                 | -7.94                |
| SLC7A3   | Cationic amino acid transporter 3 (CAT-3)(Cationic amino acid transporter $\gamma$ )(Solute carrier family 7 member 3)                                                                                                                                                                   | -7.83                |
| SALL4    | Sal-like protein 4 (Zinc finger protein SALL4)                                                                                                                                                                                                                                           | -7.82                |
| TDGF1    | Teratocarcinoma-derived growth factor 1 Precursor (Epidermal growth factor-like cripto protein CR1)(Cripto-1 growth factor)(CRGF)                                                                                                                                                        | -7.71                |
| CRABP1   | Cellular retinoic acid-binding protein 1 (Cellular retinoic acid-binding protein I)(CRABP-I)                                                                                                                                                                                             | -7.42                |
| LECT1    | Chondromodulin-1 Precursor (Chondromodulin-I)(ChM-I)(Leukocyte cell-derived chemotaxin 1) [Contains Chondrosurfactant protein(CH-SP)]                                                                                                                                                    | -7.36                |
| ZSCAN10  | Zinc finger and SCAN domain-containing protein 10 (Zinc finger protein 206)                                                                                                                                                                                                              | -7.28                |
| ZFP42    | Zinc finger protein 42 homolog (Zfp-42)(Reduced expression protein 1)(REX-1)(hREX-1)(Zinc finger protein 754)                                                                                                                                                                            | -7.18                |
| EDNRB    | Endothelin B receptor Precursor (ET-B)(Endothelin receptor non-selective type)                                                                                                                                                                                                           | -7.17                |
| FOXN3    | Forkhead box protein N3 (Checkpoint suppressor 1)                                                                                                                                                                                                                                        | -7.13                |
| GPM6B    | Neuronal membrane glycoprotein M6-b (M6b)                                                                                                                                                                                                                                                | -7.08                |
| RASL11B  | Ras-like protein family member 11B                                                                                                                                                                                                                                                       | -7.07                |
| PXDN     | Peroxidasin homolog Precursor (EC 1.11.1.7)(Vascular peroxidase 1)(Melanoma-associated antigen MG50)(p53-responsive gene 2 protein)                                                                                                                                                      | -7.06                |

# Table 1

## Primers used in the study

| Gene or miRNA  | Sense                   | Antisense            |
|----------------|-------------------------|----------------------|
| $\beta$ -actin | ACCTGACTGACTACCTCATG    | GCAGCCGTGGCCATCTCTTG |
| Oct4           | CGGAAAGAGAAAGCGAACCA    | CGGACCACATCCTTCTCCAG |
| NANOG          | CAGAAGGCCTCAGCACCTAC    | ACTGGATGTTCTGGGTCTGG |
| Sox2           | CAAGATGCACAACTCGGAGA    | CGGGGCCGGTATTTATAATC |
| Klf4           | AAACTGACCCTCCTCCAGGT    | TGCTTTGCTCCAGGAACTTT |
| hTERT          | GTGCACCAACATCTACAAGATCC | GTTCTTCCAACTTGCTGATG |
| c-Myc          | GCCAGAGGAGGAACGAGCTA    | TGGACGGACAGGATGTATGC |
| p53            | GCTTCGAGATGTTCCGAGAG    | TTATGGCGGGAGGTAGACTG |
| PROM1          | TGGCAACGTAGTGACTCAGG    | ACAGGAAGGGAGGGAGTCAT |
| CD44           | AAGGTGGAGCAAACACAACC    | GCTTTTTCTTCTGCCACAC  |
| RGM249         | TGGTACTTCACGAGGATGTGA   | CCTGCCTCCTGAGTCTTCTG |
| ELAVL2         | CTGCCATGGAAACACAACCTG   | TTCTTCTGCCTCAATTCGCT |
| AICDA          | CGTAGTGAAGAGGCGTGACA    | TGTAGCGGAGGAAGAGCAAT |
| DNMT1          | GCAAGAAGTGAAGCCCGTAG    | TGAACGTTAGCCTCTCCAT  |
| HDAC           | GCTCAGCTGGTCATTCAACA    | ACTGCCTGGTTGCTTCAGTT |
| Sin3A          | TTTTTATGCGACTGCACCAG    | CGTTCCCATTCTCTCTCTCG |
| MBD3           | TGTCCCAGCTCCTTGAGACT    | CAAACACGCCTCCAGACC   |
| SIRT1          | TCAGTGGCTGGAACAGTGAG    | AGCGCCATGGAAAATGTAAC |
| miR-520d       | TCTACAAAGGGAAGCCCTTCTG  |                      |



1 Supporting File Legends

2 **Supplementary Figure S1**

3 A. DNA content in 293FT, mock-293FT and 520d-293FT were assessed in  
4 approximately 20,000 collected events. GFP-positive cells in mock-293FT and  
5 520d-293FT were sorted. Cell cycle analysis of 520d-293FT showed increases and  
6 decreases in the S and G0 phases, respectively, with synchronized and  
7 homogeneous proliferation compared with 293FT and mock-293FT, although the  
8 effect of miR-520p on G0, S phase did not appear to be significant.

9 B. Sorted immature populations were shown as PE positive cells or GFP (+) and  
10 ALP-PE (+) cells as arrows indicated. The cells were maintained in an immature state  
11 for two weeks after sorting. Although we found GFP (-) cells more than cells received  
12 2% formaldehyde treatment due to the leakage of GFP during staining process, GFP  
13 (-) cells post-sorting had a similar populations to GFP (+) cells regarding gene  
14 expression and phenotype.

15 C. Transcriptional examination of methylation status to determine the 520d-293FT  
16 reprogramming level. DNMT1 was not significantly expressed compared with  
17 mock-293FT, although HDAC, Sin3A and MBD3 expression levels were significantly  
18 upregulated ( $P < 0.01$ ) (top). In HLF, DNMT1 was not significantly expressed  
19 compared with mock-HLF, but HDAC, Sin3A and MBD3 levels were significantly  
20 downregulated ( $P < 0.01$ ), unlike those in 293FT (bottom). Significant differences  
21 were not observed in expression levels between 293FT and HLF or between  
22 mock-293FT and mock-HLF, but the average relative ratio of 520d-293FT to

1 520d-HLF was 261.3 (range: 11.9-2164.8). Data (n = 9) were analyzed with a Mann-  
2 Whitney U test. \*\*: P < 0.01.

3 D. FACS analysis in which mock- and 520d-293FT or mock- and 520d-HLF were  
4 compared. After 3 days, GFP positive or ALP positive cell frequencies were  
5 estimated. After one week under culture conditions to maintain an immature state,  
6 the majority of 520d-expressing 293FT and HLF cells expressed the pluripotent  
7 marker ALP (PE-labeled).

8 E. GFP (+) and ALP-PE (+) cells were selected and maintained in an immature state  
9 for 2 weeks after sorting. The phenotype of these cells before sorting was similar to  
10 that of iPS-like cells, and the sorted HLF continued to express GFP after sorting (left;  
11 two weeks post-sorting, right; three weeks post-sorting).

12

### 13 **Supplementary Figure S2**

14 Result of *In vitro* study and microscopic observations in miR-520d-virus-infected  
15 293FT cells (520d-293FT) were shown.

16 A. Phenotypic changes in 520d-293FT were evaluated microscopically. Changes in  
17 cell morphology of 520d-293FT (right) was shown. Many non-adherent cells as well  
18 as adherent cells emerged after transfection in 12-24 hours. 293FT cells (control)  
19 were shown (left).

20 B. Confirmation of GFP expression in 520d-293FT that resembled a human-induced  
21 pluripotent stem cell. GFP-positive non-adherent cells were cultured in feeder  
22 cell-free ES cell medium.

1 C. Time-lapse observations of an induced cell with GFP expression for 12 hours (x40  
2 magnification) to show morphology and proliferation. Observation of another cell in  
3 video mode is provided as Supplementary video 7. 520d-293FT maintained in Repro  
4 Stem medium grew up while maintaining the form of the colony unlike those cultured  
5 in DMEM. Scattered spheroid colonies were interlinked through long, branched  
6 groups of cells.

7 D. Immunocytochemistry in a representative round cell with an anti-Oct4 antibody  
8 and a Rhodamine Red-conjugated secondary antibody. Oct4 was strongly expressed.  
9 Unstained cells (left) and cells with Oct4 staining (right) were shown.

10 E. Immunocytostaining with an anti-Nanog antibody concomitantly with GFP  
11 expression. Three days to one week later, the cells formed larger colonies and  
12 maintained a Nanog-positive state under the same culture conditions.

13 F. The effects on miRNA expression were confirmed in 520d-293FT and the relative  
14 ratio to hiPSCs was shown. 520d-293FT stably expressed miR-520d-5p in both the  
15 adherent and non-adherent states in culture and the viral infection efficiency was  
16 greater than 99.1% according to GFP-positive cell sorting. miR-520d was significantly  
17 upregulated in 520d-293FT compared with hiPSCs. \*:  $P < 0.05$ , \*\*:  $P < 0.01$ . Data ( $n$   
18 = 9) were analyzed using a Mann–Whitney U test. A: adherent cells, non-A:  
19 non-adherent spherical cells.

20 G. Comparison of transcriptional expression in 520d-293FT, hiPSCs or mock-293FT.  
21 RT-PCR showed that 520d-293FT showed greater upregulation of P53 and *RGM249*  
22 and weaker expression of Oct4 and hTERT than did hiPSCs. However, 520d-293FT

1 showed greater upregulation of Oct4 than did mock-293FT. 520d-293FT showed  
2 greater upregulation of P53, *RGM249* and Oct4 expression than 293FT.

3 H. Western blotting was performed in hiPSCs, mock-293FT and 520d-293FT.  
4 Western blotting showed that non-adherent cells expressed P53 and Oct4 stronger  
5 than mock-293FT. *Dicer1* expression was also downregulated compared with  
6 mock-293FT. The expression of AID known as one of epigenetic markers was  
7 downregulated compared with hiPSC. A: adherent cells, non-A: non-adherent cells.

8 I. Relative ratio of the representative gene expression profile to that in mock-293FT  
9 by RT-PCR. Data depict the average relative ratio of 520d-293FT to mock-293FT,  
10 and a significant difference was shown, as \*:P < 0.01 (n = 5). The pluripotent markers,  
11 P53 and *RGM249* were upregulated, whereas AID was downregulated. Cancer stem  
12 cell (CSC) markers (CD133 and CD44) were not upregulated.

### 14 **Supplementary Figure S3**

15 A. Immunohistochemical analysis of liver tissue generated from 520d-HLF cells in  
16 xenograft model. (left) Human albumin was expressed strongly in hepatocytes from  
17 liver tissue generated from 520d-HLF cells in a xenograft model. (middle-right)  
18 Human AFP or GFAP were expressed weakly in the cytoplasm of hepatocytes.

19 B-C. Osteoblastic differentiation from 520d-HLF cells was induced morphologically  
20 and transcriptionally. **B.** Morphological changes were shown in 520d-HLF that were  
21 treated with 2  $\mu$ M purmorphamine (top) compared with untreated 520d-HLF cells  
22 (bottom). **C.** IBSP (bone sialoprotein) and SPP1 (osteopontin) were strongly  
23 expressed in 520d-HLF cells treated with 2  $\mu$ M purmorphamine (n = 4). P:

1 purmorphamine-treated 520d-HLF, \*\*:  $P < 0.01$ . Tumorigenicity of well-differentiated  
2 hepatoma cells (Huh7) received miR-520d-5p was examined.

3 D. Induction of pluripotency by miR-520d in Huh7. Colonies of small round cells  
4 emerged within 12 days. Both GFP (left top) and Oct4 (right top) expression were  
5 confirmed by immunocytochemistry. Average gene expression levels were examined  
6 ( $n = 5$ ) and pluripotent marker gene and P53 mRNA levels were upregulated  
7 compared with mock-Huh7 (right column). Alb, c-Myc, AID and *RGM249* levels were  
8 downregulated. 1-17: Oct4, Nanog, P53, hTERT, c-Myc, PROM1, CD44, AID, HDAC,  
9 DNMT1, Sin3A, MBD3, Lin28, *RGM249*, AFP, Alb and miR-520d.

10 E. With the same viral vehicle titer used in the previous *in vivo* study with HLF, ten  
11 mice inoculated mock-Huh7 formed a tumor (top). The HE stain of representative  
12 tumor was shown. Well-differentiated neoplastic cells (partly squamous cell  
13 carcinoma-like cells) with substantial or alveolar arrangement were shown (bottom;  
14 x100).

15 F. 520d-Huh7 was cultured for one week (once per week, we infected cells with the  
16 viral construct *in vitro*), tumorigenicity was confirmed one month after inoculation.

17 G. Fifty percent of inoculated mice generated less-differentiated tumors one month  
18 later; the remaining mice did not generate tumors ( $n = 4$ ). HE staining (x200  
19 magnification) showed that the tumors were identical with low-differentiated  
20 hepatoma (left) and poorly-differentiated hepatoma (right).

21 H. Average methylation rate of Huh7 was 0.20% and the data was standardized,  
22 compared with that in Huh7. An average hmC(%) in Huh7 cells was estimated to  
23 understand general methylation level during de-differentiation process by



1 miR-520d-5p. Induction of hypermethylation was not induced in this cell type, but  
2 decreasing methylation level after 3D were observed, followed by the decrease less  
3 than iPS level a month later (n=3).

4

#### 5 **Supplementary Figure S4**

6 A. Summarized pathway map (original summarized scheme) from HMT analysis. The  
7 result of this analysis was described in the discussion section in this text.

8 B. heat map (original data) obtained from metabolomic analysis. Mock-HLF and HLF  
9 (parental cells) were prominently different from the other four types of cells that  
10 expressed miR-520d-5p.

11 C. A principal component analysis (PCA). Mock-HLF and HLF were found to have  
12 similar patterns, and the patterns of 7D and R1 were similar. R2 appears to possess  
13 similar characteristics to those of 5D and 7D (or R1).

14

#### 15 **Supplementary Figure S5**

16 The 10 predicted binding sites (shown in red letters) of miR-520d-5p in the 3'UTR  
17 (1356-3805) of ELAVL2 (1-3805) are shown. Two sites (1853-1880 and 2235-2249 in  
18 3'UTR) were investigated with a luciferase reporter expression assay. These sites  
19 were predicted based on the four databases described above. Bases 1607-1626 of  
20 the 3'UTR were used for a sense primer sequence.

21

#### 22 **Supplementary Figure S6**

1 Tumorigenicity of miR-520d-expressing fibroblasts (NHDF-Neo and -Ad) in KSN/Slc  
2 mice.

3 A. Parental cells [NHDF-Neo (left) and -Ad (right), x200 magnification] were infected  
4 with a miR-520d-expressing lentiviral vector and inoculated into the right hindquarters  
5 of KSN/Slc mice.

6 B. The fibroblast lines are represented as 520d-NHDF-Neo and 520d-NHDF-Ad. The  
7 phenotype of 520d-NHDF-Neo is shown (left; x100 magnification).  
8 Immunocytochemistry revealed the upregulation of Nanog (right) and Oct4 (middle)  
9 in 520d-NHDF-Neo (white bar = 20  $\mu$ m).

10 C. The phenotype of 520d-NHDF-Ad is shown (left; x40 magnification).  
11 Immunocytochemistry revealed the upregulation of Nanog expression (middle; white  
12 bar = 20  $\mu$ m). Average mRNA expression level of 520d-NHDF-Ad to mock-NHDF-Ad  
13 was shown.

14 D. The tumorigenicity of 520d-induced fibroblasts was examined in KSN/Slc mice.  
15 Neither 520d-NHDF-Neo (n = 3) nor -Ad (n = 3; right) generated tumors in mice.

16

### 17 **Supplementary File (video) 7**

18 520d-HLF cells in video mode is provided by time-lapse image.

19

### 20 **Supplementary File 8**

21 Oct4 or Nanog expression in a parental HLF, pCDH-HLF or psiLV (scrambled)-HLF  
22 was shown. pCDH and psiLV were used as controls for pMIR-520d-5p and siELAVL2  
23 [unstained (top), ICC: Nanog (middle) and ICC: Oct4 (bottom)]. Nanog and Oct4 were

1 both weakly expressing the pluripotent markers. Approximately 8% of populations in  
2 HLF cells seemed to be slightly expressing both markers stronger than other  
3 populations around them. Also, Oct4 was expressed in each sample weaker than  
4 Nanog. ICC: immunocytochemistry.

5 **Supplementary File 9**

6 Normalized data between R1 and hiPSC in microarray analysis is shown as a graph.

7 **Supplementary File 10**

8 Upregulated 20 genes (more than 8 fold) were representatively shown between R1  
9 and hiPSC for reference (n=1). R1 was a cell population formed liver tissue *in vivo*.

10 **Supplementary File 11**

11 Downregulated 20 genes (more than 8 fold) were representatively shown between  
12 R1 and hiPSC for reference (n=1).

13 **Supplementary Table S1**

14 Primers used in this study are shown.

15
